# Supplementary material for: 6-Aza-2-Thiothymine as an Alternative Matrix for Spatial Proteomics with MALDI-MSI
Source: MDPI journal article supplement (doi:10.3390/ijms252413678), 2024-12-21
Supplement: s1 [file ijms-3326013-supplementary.pdf › ijms-3326013-supplementary.pdf]

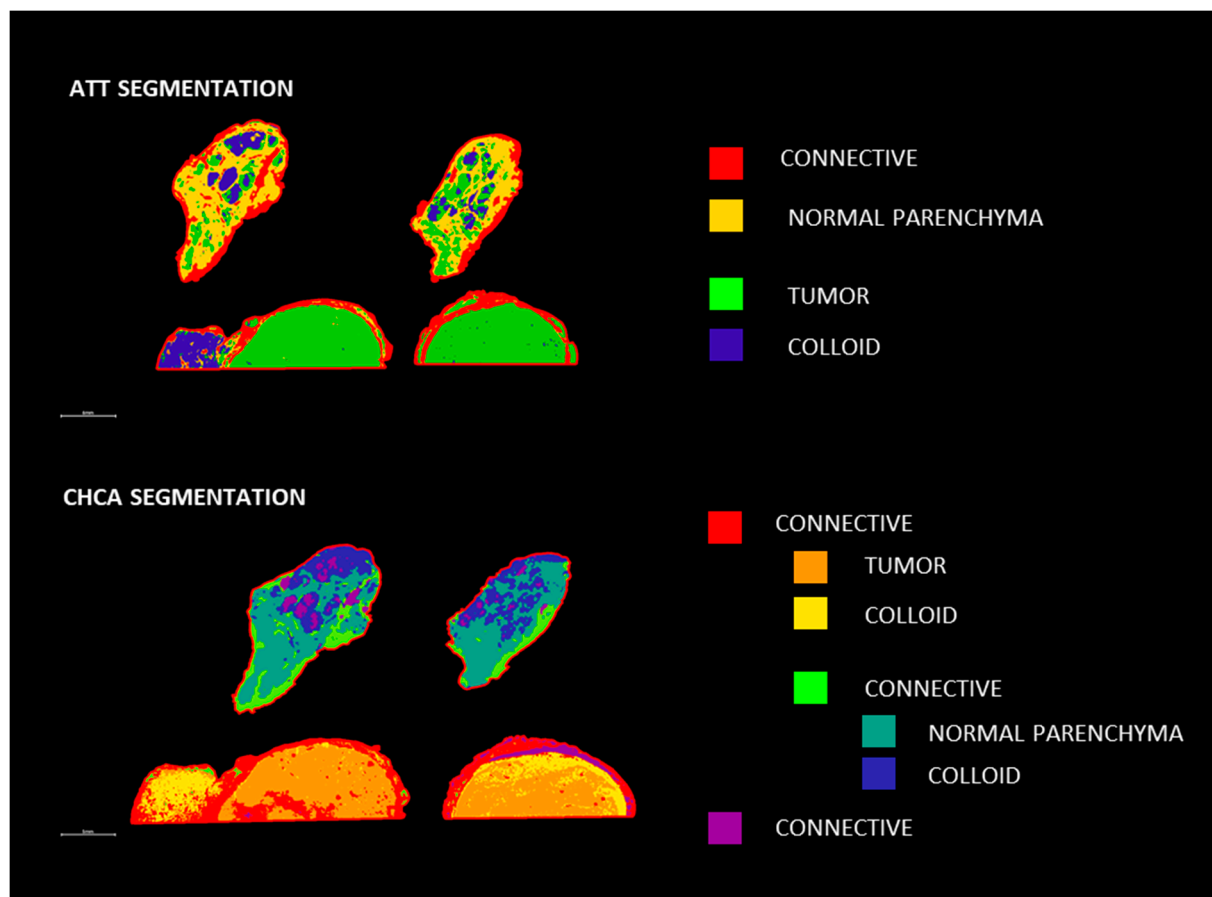

**Figure S1.** Bisecting K-Means segmentation cluster tree of the thyroid tissues analysed with ATT and CHCA, based on the proteomic data, allowed the distinction of different regions throughout the tissues.

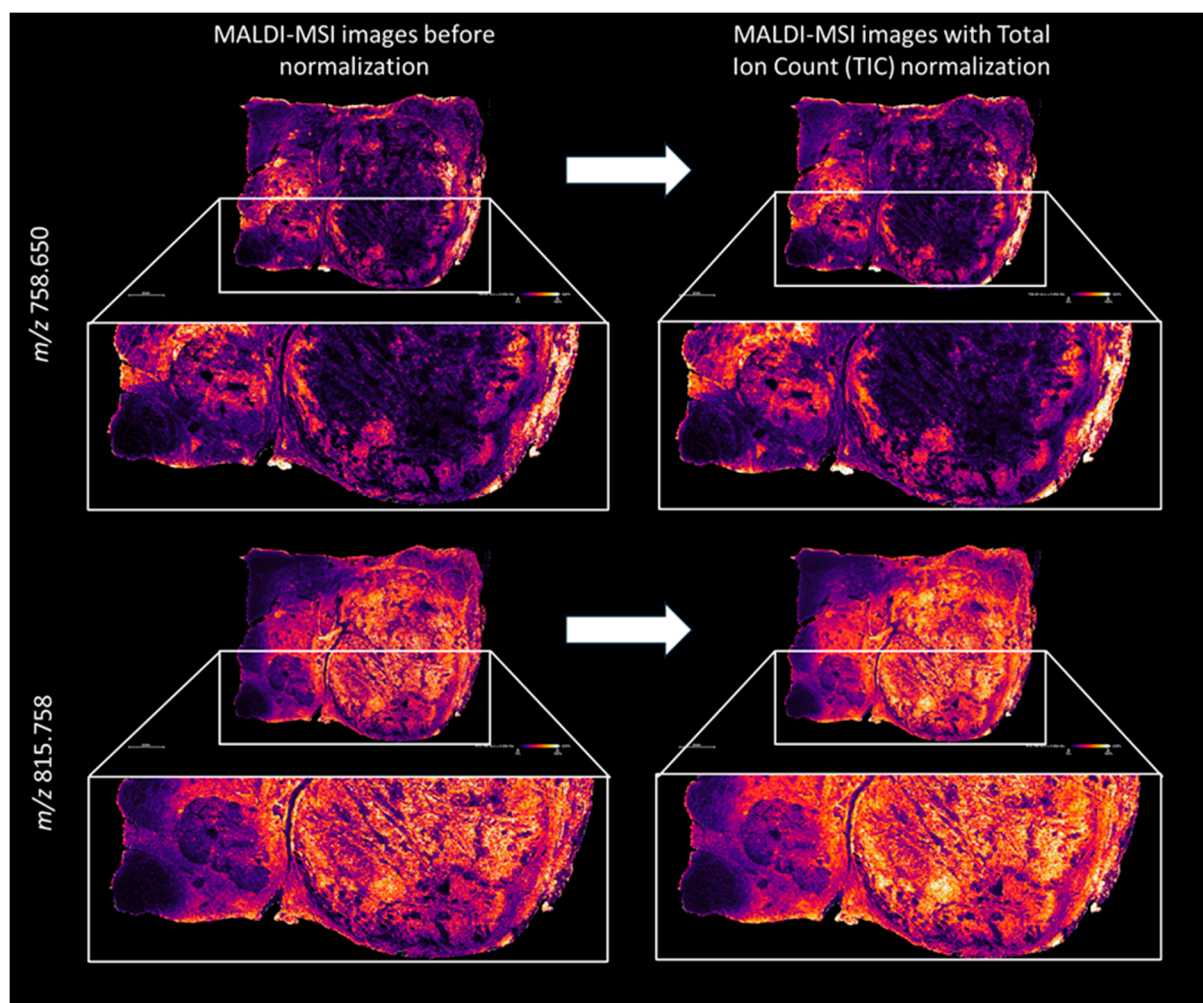

**Figure S2.** MALDI-MSI images of FFPE ccRCC tissue analysed with ATT matrix using RapifleX MALDI TissueTyper mass spectrometer before (left panel) and after (right panel) Total Ion Count normalisation. Time of analysis ~ 7.5h.

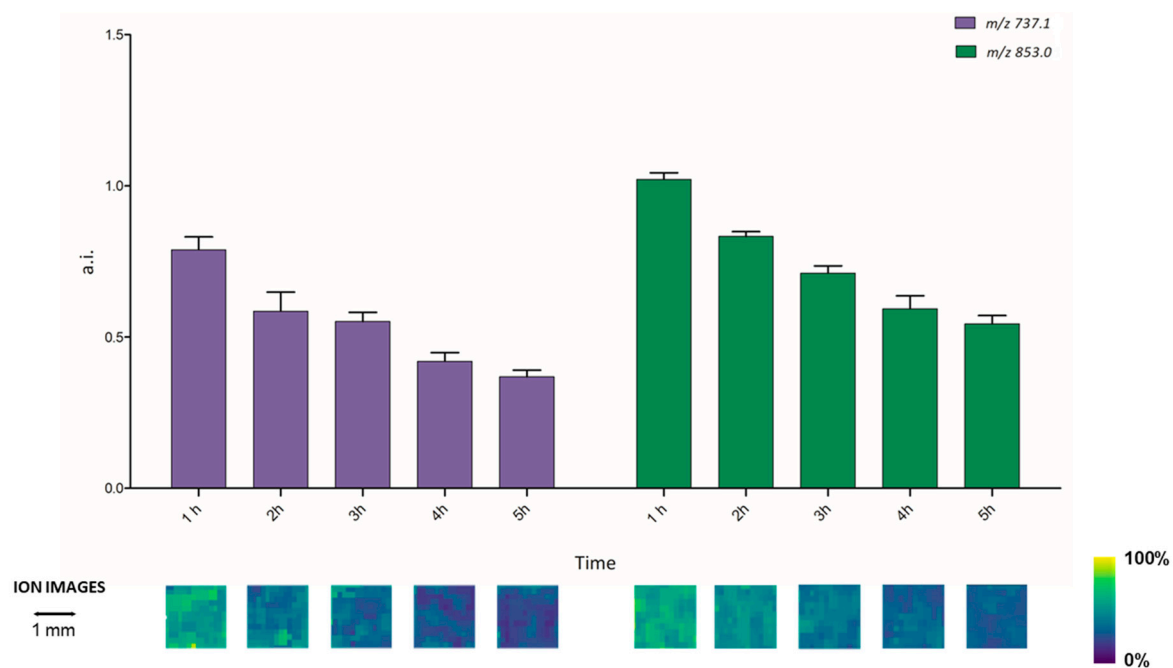

**Figure S3.** On the top, graphical representation of ATT sublimation – considering two ATT matrix peaks  $m/z$  737.1 and 853.0 – on tissues up to 5 hours after matrix deposition. Time and absolute intensity (a.i) are presented in the X and Y axes respectively. On the bottom, ion images of the tissues section corresponding to the time of the analyses are shown.

| Observed <i>m/z</i><br>(MALDI-MSI) | Expected<br><i>m/z</i> | Protein ID                 | Sequence                                             | $\Delta$ ppm | $\Delta$ Da |    |
|------------------------------------|------------------------|----------------------------|------------------------------------------------------|--------------|-------------|----|
| 944.53                             | 944.53                 | H2A1_HUMAN                 | r.AGLQFPVGR.v                                        | 2            | 0.00        | *  |
| 1105.57                            | 1105.58                | CO1A1_HUMAN                | r.VQGPPGPAGPR.g(Hydroxylated)                        | -9           | -0.01       | ** |
| 1428.71                            | 1428.71                | VIME_HUMAN                 | r.SLYASSPGGVYATR.s                                   | -1           | 0.00        | *  |
| 2215.00                            | 2215.07                | ACTB_HUMAN /<br>ACTG_HUMAN | k.DLYANTVLSGGTTMYPGIADR.m                            | -32          | -0.07       | *  |
| 2869.43                            | 2869.41                | CO1A1_HUMAN                | r.GLTGPIGPPGPAGAPGDKGESGPSGPAGPTGAR.g (Hydroxylated) | 7            | 0.02        | ** |
| 2959.43                            | 2959.41                | CO2A1_HUMAN                | r.GPPGAAGAPGPFQFGPAGEPGEFGQTGPAGAR.g (Hydroxylated)  | 8            | 0.02        | ** |
| 2959.40                            | 2959.66                | RRBP1_HUMAN                | R.APAVAVAPTPVQPPPIIVAPVATVPAMPQEK.L                  | -87          | -0.26       | *  |

\* identity confirmed with internal libraries nanoLC-MS/MS  
and or in situ MS/MS

\*\* confirmed with literature data [1]

## Table S1.

## References

1. Groseclose MR, Massion PP, Chaurand P, Caprioli RM. High-throughput proteomic analysis of formalin-fixed paraffin-embedded tissue microarrays using MALDI imaging mass spectrometry. *Proteomics*. 2008;8: 3715–3724.
